# Supplementary material for: Integrating MXene nanosheets with cobalt-tipped carbon nanotubes for an efficient oxygen reduction reaction
Source: Royal Society of Chemistry journal article supplement (doi:10.1039/c8ta10574j), 2018-12-11
Supplement: c8ta10574j1.pdf [file c8ta10574j1.pdf]

## Supporting Information

### **Interacting MXene Nanosheets with Cobalt-Tipped Carbon Nanotubes for Efficient Oxygen Reduction Reaction**

*Jianian Chen,<sup>†</sup> Xiaolei Yuan,<sup>†</sup> Fenglei Lyu,<sup>\*</sup> Qixuan Zhong, Huicheng Hu, Qi Pan and Qiao Zhang<sup>\*</sup>*

Institute of Functional Nano and Soft Materials (FUNSOM), Jiangsu Key Laboratory for Carbon-Based Functional Materials and Devices, Soochow University, 199 Ren'ai Road, Suzhou, 215123, Jiangsu, People's Republic of China.

E-mail: flly@suda.edu.cn (F. Lyu);

Email: qiaozhang@suda.edu.cn (Q. Zhang)

<sup>†</sup> Jianian Chen and Xiaolei Yuan contributed equally to this work.

## Supporting Figures

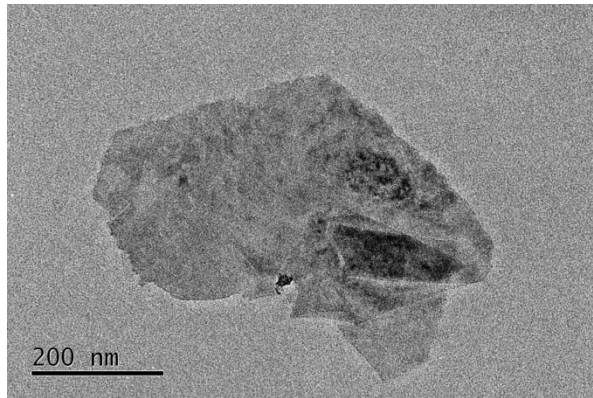

**Figure S1.** TEM image of Ti<sub>3</sub>C<sub>2</sub> nanosheets.

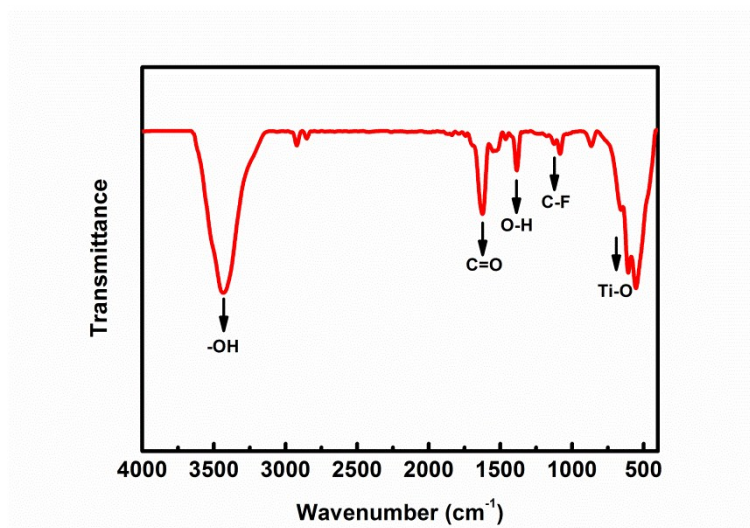

**Figure S2.** FTIR spectrum of Ti<sub>3</sub>C<sub>2</sub> nanosheets.

The function groups on the surface of Ti<sub>3</sub>C<sub>2</sub> were examined by Fourier Transformed Infrared (FTIR) Spectroscopy. Peaks at 3430 cm<sup>-1</sup>, 1630 cm<sup>-1</sup>, 1390 cm<sup>-1</sup>, 1100 cm<sup>-1</sup> and 662 cm<sup>-1</sup> can be attributed to the stretching vibrations of -OH, C=O, O-H, C-F and Ti-O bonds, which agreed well with the previous report.<sup>1</sup>

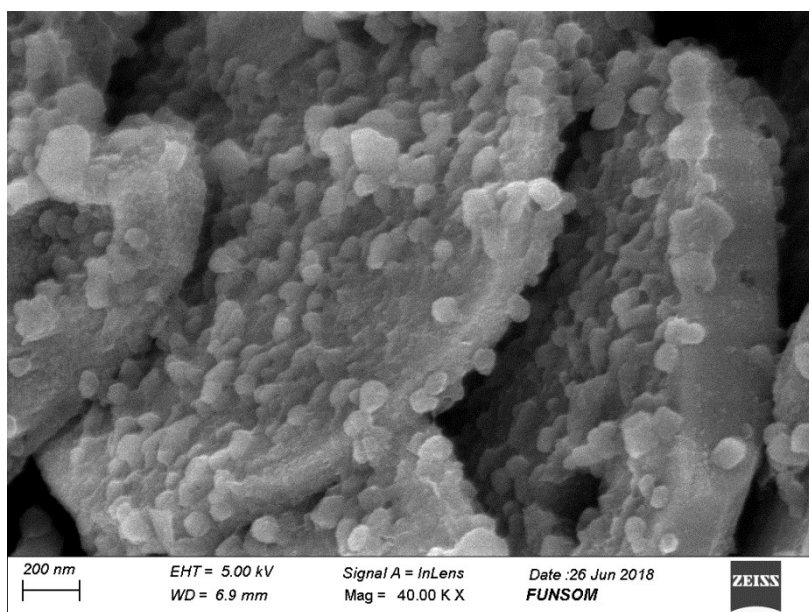

**Figure S3.** SEM image of ZIF-67/Ti<sub>3</sub>C<sub>2</sub>-60.

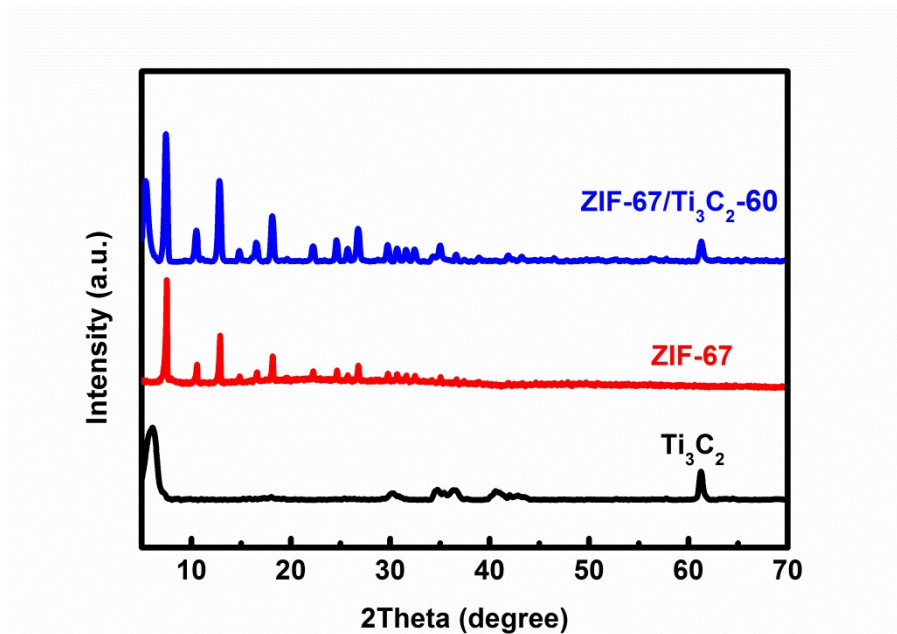

**Figure S4.** XRD patterns of Ti<sub>3</sub>C<sub>2</sub>, ZIF-67 and ZIF-67/Ti<sub>3</sub>C<sub>2</sub>-60.

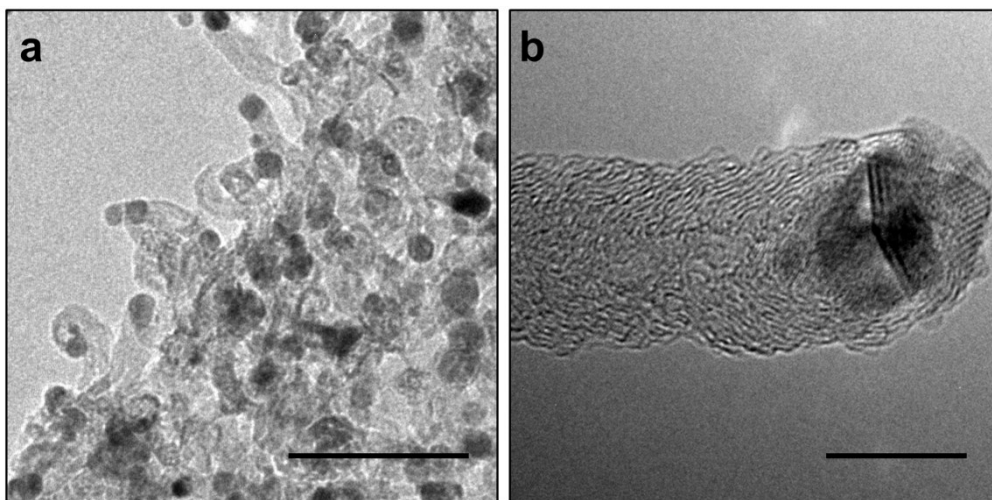

**Figure S5.** TEM and HRTEM images of Co-CNT/Ti<sub>3</sub>C<sub>2</sub>-60. Scale bars are 100 nm and 10 nm in (a) and (b), respectively.

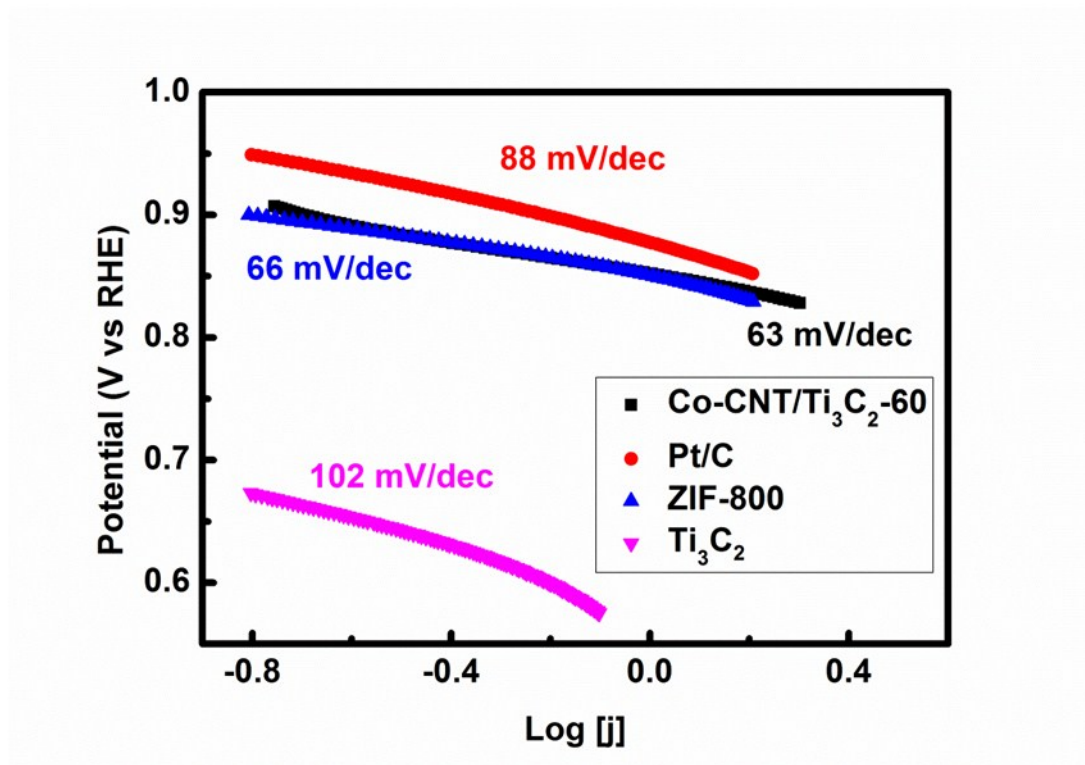

**Figure S6.** Tafel plots of Co-CNT/Ti<sub>3</sub>C<sub>2</sub>-60, Pt/C, ZIF-800 and Ti<sub>3</sub>C<sub>2</sub>.

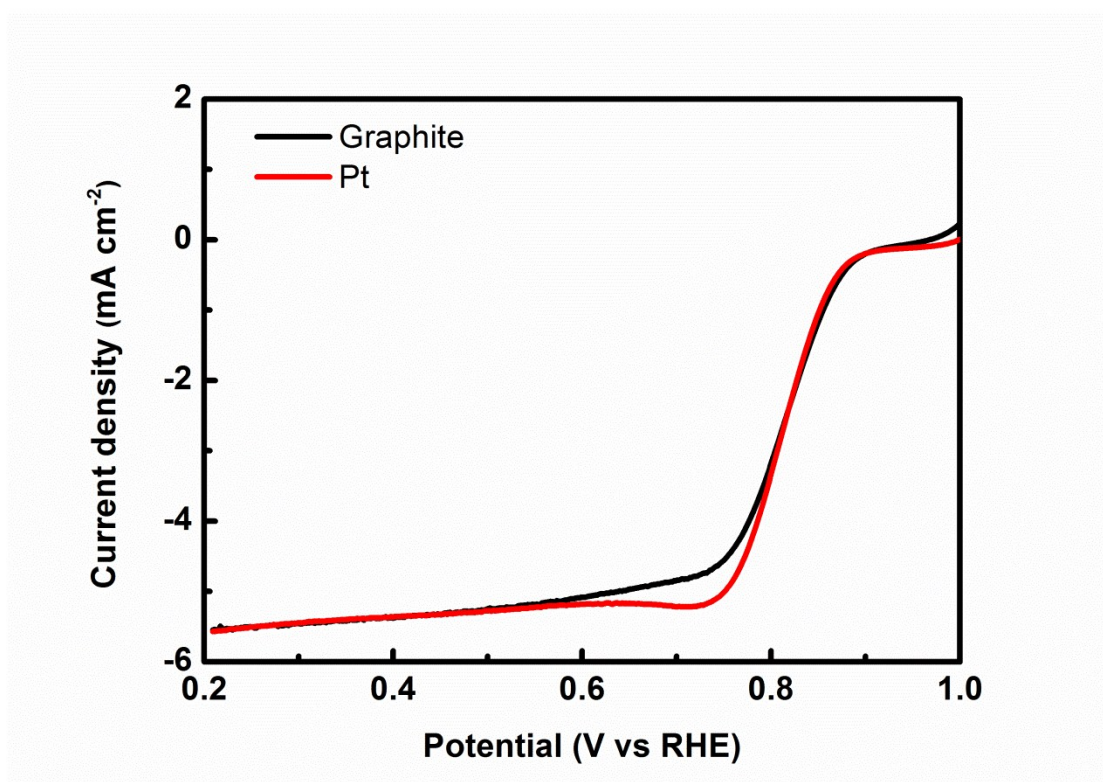

**Figure S7.** LSV curves of Co-CNT/Ti<sub>3</sub>C<sub>2</sub>-60 with graphite rod (black) and Pt (red) as counter electrode.



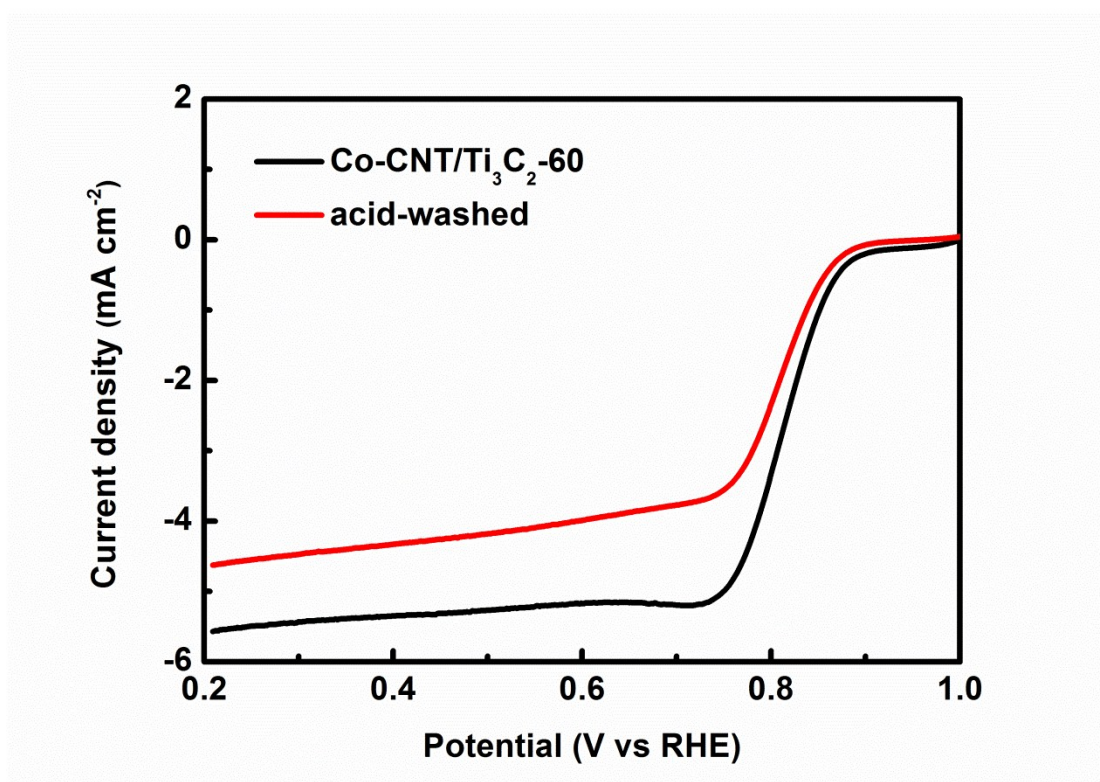

**Figure S8.** LSV curve of Co-CNT/Ti<sub>3</sub>C<sub>2</sub>-60 after acid treatment.

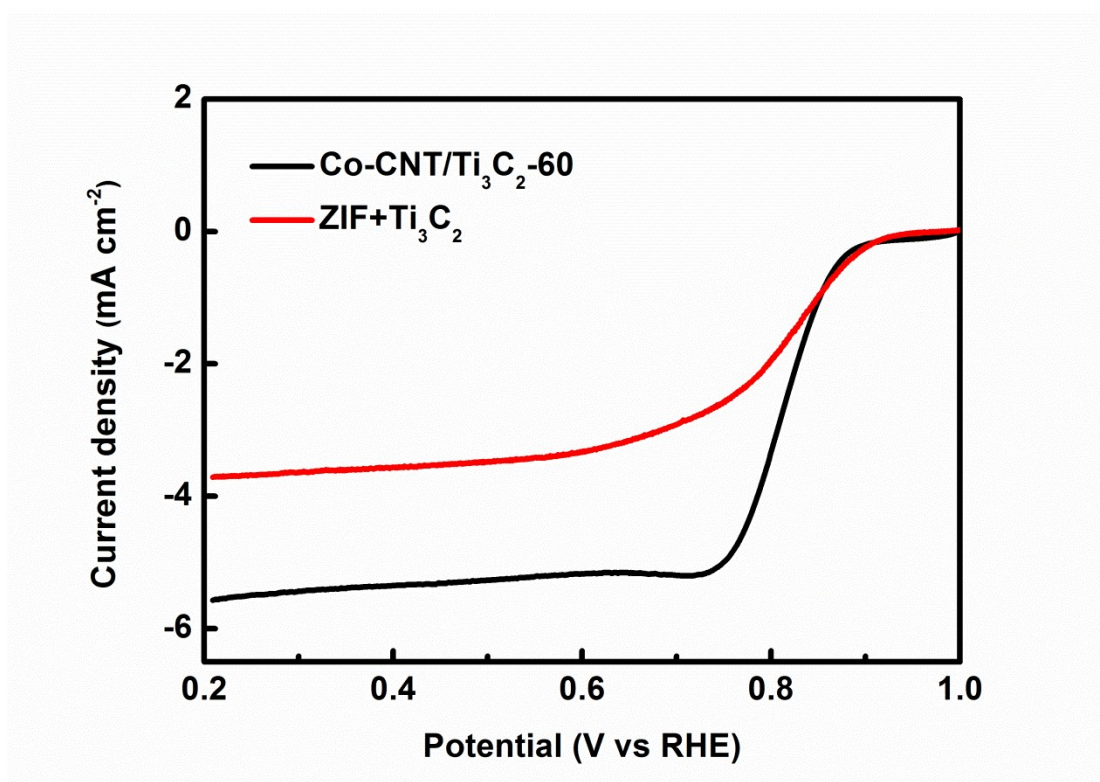

**Figure S9.** LSV curve of ZIF-800 and Ti<sub>3</sub>C<sub>2</sub> mixture.

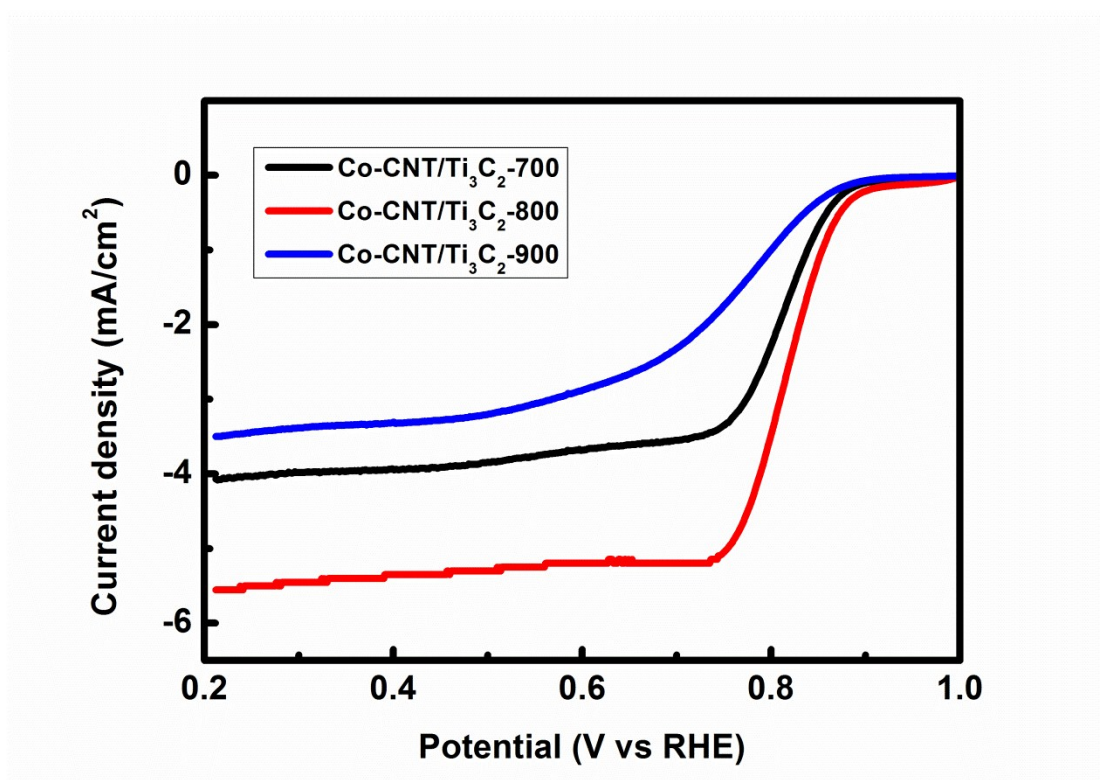

**Figure S10.** LSV curve of ZIF-67/Ti<sub>3</sub>C<sub>2</sub> with different pyrolysis temperatures.

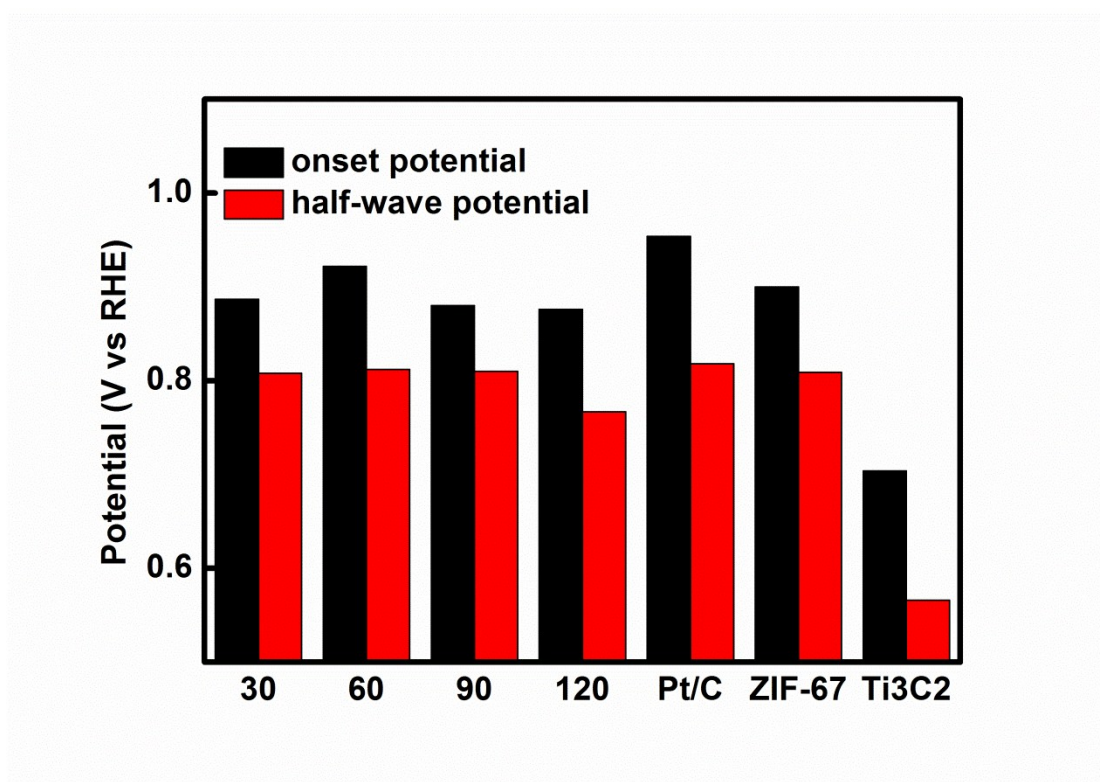

**Figure S11.** Onset potential and half-wave potential of Co-CNT/Ti<sub>3</sub>C<sub>2</sub>-30, Co-CNT/Ti<sub>3</sub>C<sub>2</sub>-60, Co-CNT/Ti<sub>3</sub>C<sub>2</sub>-90, Co-CNT/Ti<sub>3</sub>C<sub>2</sub>-120, Pt/C, ZIF and Ti<sub>3</sub>C<sub>2</sub>.

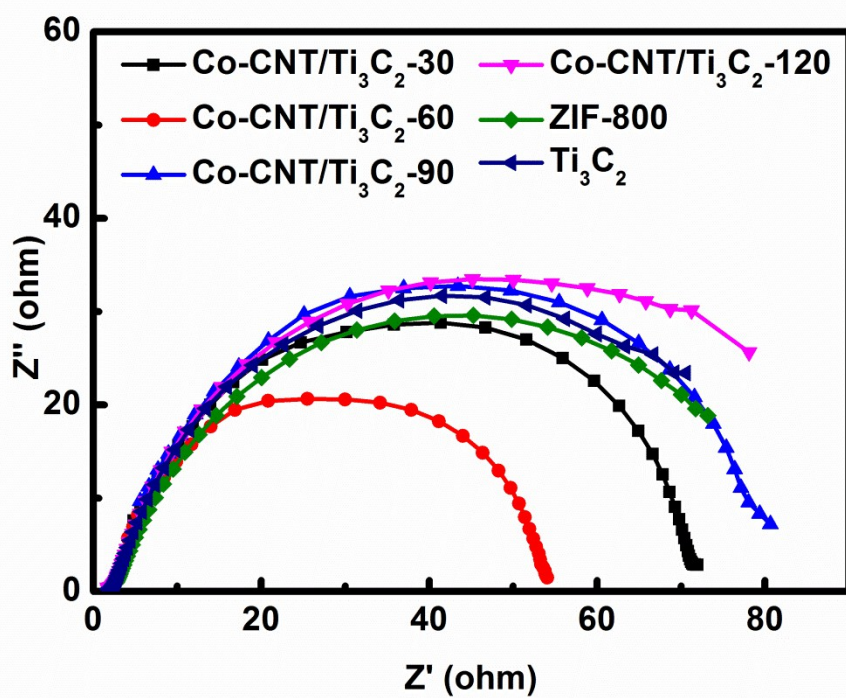

**Figure S12.** Electrochemical impedance spectroscopy (EIS) plots for Co-CNT/Ti<sub>3</sub>C<sub>2</sub>-30, Co-CNT/Ti<sub>3</sub>C<sub>2</sub>-60, Co-CNT/Ti<sub>3</sub>C<sub>2</sub>-90, Co-CNT/Ti<sub>3</sub>C<sub>2</sub>-120, ZIF-800 and Ti<sub>3</sub>C<sub>2</sub>.



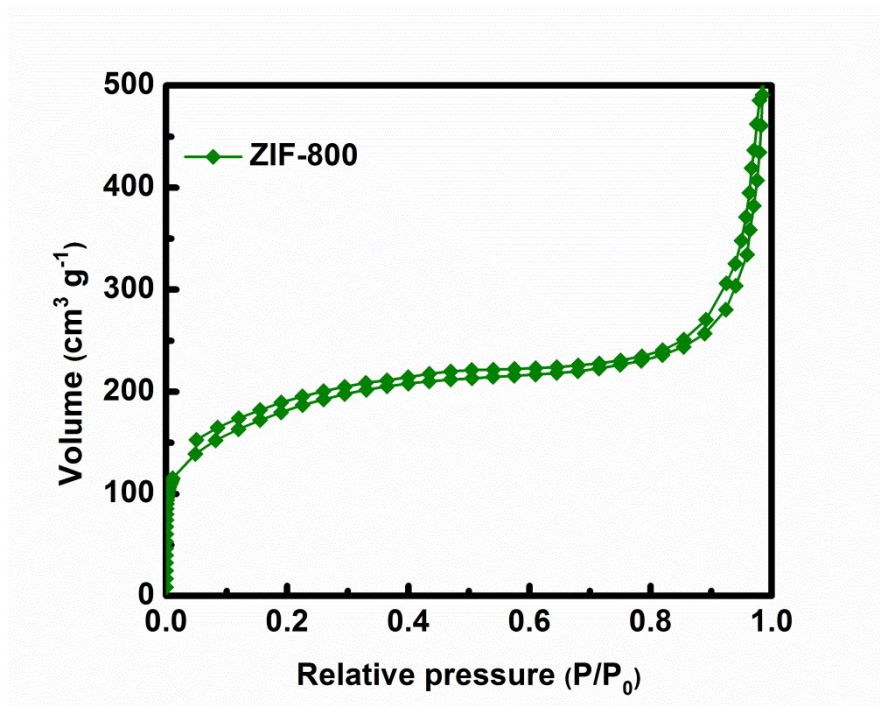

**Figure S13.** Nitrogen adsorption-desorption isotherms of ZIF-800.

**Table S1.** Comparisons of ORR performance between recent reported cobalt-based electrocatalysts with Co-CNT/Ti<sub>3</sub>C<sub>2</sub>-60.

| Electrocatalysts                             | E <sub>1/2</sub> (V vs RHE) | Electron transfer number (n) | Tafel slope (mV/dec) | Reference        |
|----------------------------------------------|-----------------------------|------------------------------|----------------------|------------------|
| CeO <sub>2</sub> -Co-NC hollow nanospheres   | 0.80                        | 3.61-3.78                    | 60                   | 2                |
| Co-N/CNFs                                    | 0.82                        | ~3.88                        | NG                   | 3                |
| CuCoO <sub>x</sub> /FeOOH                    | 0.78                        | 3.87-3.92                    | NG                   | 4                |
| Co-N <sub>2</sub> B-CSs                      | 0.83                        | 3.98-4.00                    | 64                   | 5                |
| LDH@ZIF-67-800                               | 0.83                        | ~4.00                        | 63                   | 6                |
| NC@Co-NGC DSNCs                              | 0.82                        | ~4.00                        | 51                   | 7                |
| Co@Co <sub>3</sub> O <sub>4</sub> /NC-1      | 0.80                        | ~4.00                        | NG                   | 8                |
| Co@Co <sub>3</sub> O <sub>4</sub> @C-CM      | 0.81                        | 3.80-3.90                    | NG                   | 9                |
| Co@NG                                        | 0.83                        | >3.80                        | NG                   | 10               |
| <b>Co-CNT/Ti<sub>3</sub>C<sub>2</sub>-60</b> | <b>0.82</b>                 | <b>&gt;3.90</b>              | <b>63</b>            | <b>This work</b> |

### Supporting References

1. Q. Xue, H. Zhang, M. Zhu, Z. Pei, H. Li, Z. Wang, Y. Huang, Y. Huang, Q. Deng, J. Zhou, S. Du, Q. Huang and C. Zhi, *Adv., Mater.*, **2017**, *29*, 1604847.
2. L. Lv, D. Zha, Y. Ruan, Z. Li, X. Ao, J. Zheng, J. Jiang, H. Chen, W. Chiang, J. Chen, and C. Wang, *ACS Nano* **2018**, *12*, 3042-3051.
3. Q. Cheng, L. Yang, L. Zou, Z. Zou, C. Chen, Z. Hu, and H. Yang, *ACS Catal.* **2017**, *7*, 6864-6871.
4. M. Kuang, Q. Wang, H. Ge, P. Han, Z. Gu, A. Al-Enizi, and G. Zheng, *ACS Energy Lett.* **2017**, *2*, 2498-2505.

5. Y. Guo, P. Yuan, J. Zhang, Y. Hu, I. Amiin, X. Wang, J. Zhou, H. Xia, Z. Song, Q. Xu and S. Mu, *ACS Nano* **2018**, *12*, 1894-1901.
6. Z. Li, M. Shao, L. Zhou, R. Zhang, C. Zhang, M. Wei, D. Evans and Duan, X. *Adv. Mater.* **2016**, *28*, 2337-2344.
7. S. Liu, Z. Wang, S. Zhou, F. Yu, M. Yu, C. Chiang, W. Zhou, J. Zhao and J. Qiu, *Adv. Mater.* **2017**, *29*, 1700874.
8. A. Aijaz, J. Masa, C. Rösler, W. Xia, P. Weide, A. Botz, R. Fischer, W. Schuhmann and M. Muhler, *Angew. Chem., Int. Ed.* **2016**, *55*, 4087-4091.
9. W. Xia, R. Zou, L. An, D. Xia and S. Guo, *Energy Environ. Sci.* **2015**, *8*, 568-576.
10. M. Zeng, Y. Liu, F. Zhao, K. Nie, N. Han, X. Wang, W. Huang, X. Song, J. Zhong and Y. Li, *Adv. Funct. Mater.* **2016**, *26*, 4397-4404.
